# Supplementary material
Source: ML conference proceedings conference paper supplement (https://openaccess.thecvf.com/content/CVPR2024/html/Zou_Teeth-SEG_An_Efficient_CVPR_2024_paper.html)
Supplement: Supplementary file 1 [file Zou_Teeth-SEG_An_Efficient_CVPR_2024_supplemental.pdf]

## **Contents**

|                                                                              |          |
|------------------------------------------------------------------------------|----------|
| <b>A Dataset Statistics</b>                                                  | <b>2</b> |
| <b>B The Classes Definition and The Attention Mask for<br/>The APK Layer</b> | <b>3</b> |
| <b>C Supplementary Results of The O.O.D. Test and<br/>The RGB Test.</b>      | <b>3</b> |
| <b>D Ablations on Hyper-parameters</b>                                       | <b>6</b> |

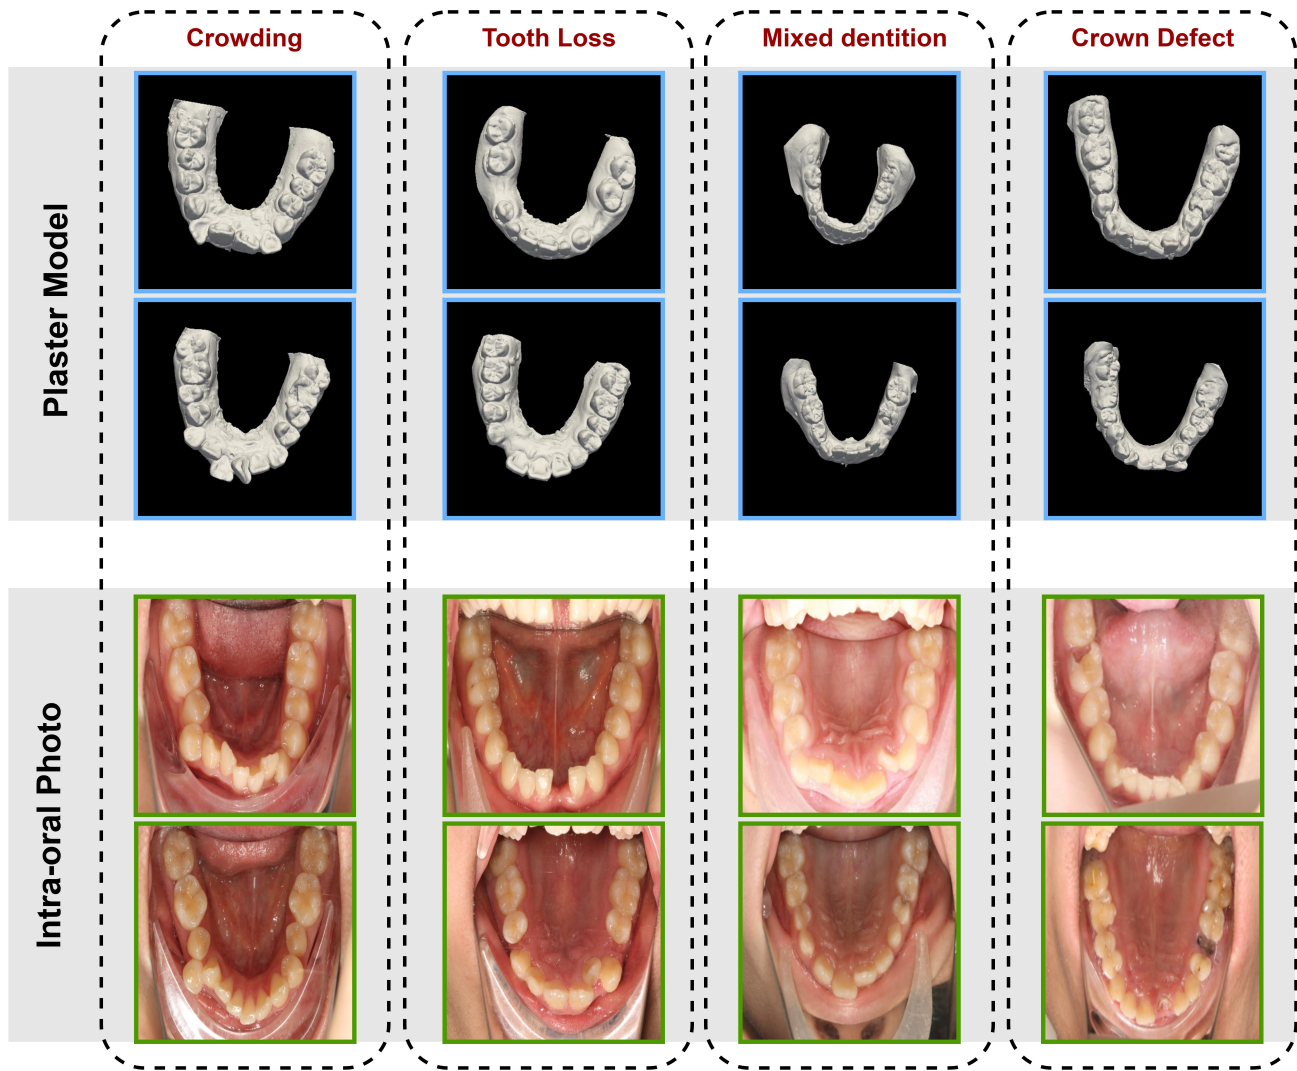

Figure 1. Visualization of Plaster70K and RGB0.8K

| Name         | Split |      |      | dental malformations |            |                 |              |
|--------------|-------|------|------|----------------------|------------|-----------------|--------------|
|              | Train | Val  | Test | Crowding             | Tooth Loss | Mixed dentition | Crown Defect |
| Challenge80K | 60k   | 10k  | 10k  | -                    | -          | -               | -            |
| Plaster70K   | 50k   | 10k  | 10k  | 44.1%                | 19.4%      | 4.5%            | 4.6%         |
| RGB0.8K      | 0.6k  | 0.1k | 0.1k | 88.8%                | 8.4%       | 14.3%           | 2.5%         |

Table 1. Dataset statistics over the three subsets of IO150K.

## A. Dataset Statistics

We summarize the dataset statistics over the three subsets of IO150K in Table 1 (we omit the statistic of dental malformations for Challenge80K, which is generated from previous open-sourced [1]) and visualize some examples from our collected Plaster70K and RGB0.8K in Figure 1.

| Method        | Epoch | T1   | T2   | T3   | T4   | T5   | T6   | T7   | T8  | T9   | T10  | T11  | T12  | T13  | T14  | T15  | T16 | mIoU |
|---------------|-------|------|------|------|------|------|------|------|-----|------|------|------|------|------|------|------|-----|------|
| DeepLab-v3    | 30    | 0.76 | 0.72 | 0.78 | 0.85 | 0.86 | 0.81 | 0.74 | NaN | 0.76 | 0.75 | 0.82 | 0.84 | 0.84 | 0.87 | 0.85 | NaN | 0.80 |
| Segformer     | 30    | 0.76 | 0.73 | 0.77 | 0.85 | 0.87 | 0.80 | 0.72 | NaN | 0.76 | 0.76 | 0.81 | 0.87 | 0.89 | 0.90 | 0.88 | NaN | 0.81 |
| Segmenter     | 30    | 0.63 | 0.61 | 0.63 | 0.74 | 0.70 | 0.68 | 0.59 | NaN | 0.62 | 0.59 | 0.68 | 0.74 | 0.70 | 0.81 | 0.78 | NaN | 0.68 |
| Swin-L        | 30    | 0.60 | 0.58 | 0.63 | 0.69 | 0.64 | 0.67 | 0.67 | NaN | 0.55 | 0.52 | 0.57 | 0.63 | 0.62 | 0.73 | 0.76 | NaN | 0.64 |
| SwinV2-G      | 30    | 0.52 | 0.48 | 0.52 | 0.59 | 0.57 | 0.68 | 0.67 | NaN | 0.49 | 0.45 | 0.53 | 0.60 | 0.66 | 0.76 | 0.76 | NaN | 0.60 |
| BeiT-B        | 30    | 0.78 | 0.76 | 0.77 | 0.83 | 0.74 | 0.76 | 0.77 | NaN | 0.79 | 0.80 | 0.82 | 0.84 | 0.76 | 0.81 | 0.82 | NaN | 0.78 |
| ViT-Adapter-L | 30    | 0.78 | 0.76 | 0.77 | 0.83 | 0.74 | 0.76 | 0.77 | NaN | 0.79 | 0.80 | 0.82 | 0.84 | 0.76 | 0.81 | 0.82 | NaN | 0.79 |
| TeethSEG      | 5     | 0.80 | 0.79 | 0.82 | 0.86 | 0.86 | 0.79 | 0.71 | NaN | 0.78 | 0.78 | 0.83 | 0.88 | 0.90 | 0.93 | 0.91 | NaN | 0.84 |

Table 2. Tooth segmentation results (mIoU) compared with SOTA methods on the IO150K out-of-the-distribution (o.o.d.) test splits

| Method        | Epoch | T1   | T2   | T3   | T4   | T5   | T6   | T7   | T8  | T9   | T10  | T11  | T12  | T13  | T14  | T15  | T16 | mIoU |
|---------------|-------|------|------|------|------|------|------|------|-----|------|------|------|------|------|------|------|-----|------|
| DeepLab-v3    | 30    | 0.76 | 0.72 | 0.78 | 0.85 | 0.86 | 0.81 | 0.74 | NaN | 0.76 | 0.75 | 0.82 | 0.84 | 0.84 | 0.87 | 0.85 | NaN | 0.80 |
| Segformer     | 30    | 0.49 | 0.52 | 0.64 | 0.89 | 0.86 | 0.85 | 0.74 | NaN | 0.45 | 0.50 | 0.65 | 0.84 | 0.83 | 0.84 | 0.57 | NaN | 0.69 |
| Segmenter     | 30    | 0.48 | 0.44 | 0.47 | 0.62 | 0.66 | 0.58 | 0.58 | NaN | 0.52 | 0.49 | 0.49 | 0.60 | 0.63 | 0.57 | 0.55 | NaN | 0.55 |
| Swin-L        | 30    | 0.43 | 0.50 | 0.58 | 0.55 | 0.49 | 0.46 | 0.58 | NaN | 0.41 | 0.51 | 0.43 | 0.35 | 0.35 | 0.51 | 0.59 | NaN | 0.48 |
| SwinV2-G      | 30    | 0.58 | 0.43 | 0.51 | 0.56 | 0.53 | 0.43 | 0.43 | NaN | 0.60 | 0.37 | 0.44 | 0.42 | 0.41 | 0.42 | 0.32 | NaN | 0.46 |
| BeiT-B        | 30    | 0.61 | 0.48 | 0.46 | 0.49 | 0.53 | 0.39 | 0.35 | NaN | 0.61 | 0.50 | 0.51 | 0.53 | 0.48 | 0.37 | 0.33 | NaN | 0.47 |
| ViT-Adapter-L | 30    | 0.83 | 0.89 | 0.89 | 0.92 | 0.92 | 0.91 | 0.83 | NaN | 0.85 | 0.88 | 0.86 | 0.92 | 0.92 | 0.89 | 0.72 | NaN | 0.85 |
| TeethSEG      | 5     | 0.91 | 0.93 | 0.88 | 0.93 | 0.94 | 0.92 | 0.87 | NaN | 0.86 | 0.94 | 0.90 | 0.94 | 0.93 | 0.93 | 0.91 | NaN | 0.91 |

Table 3. Tooth segmentation results (mIoU) compared with SOTA methods on the IO150K RGB test splits

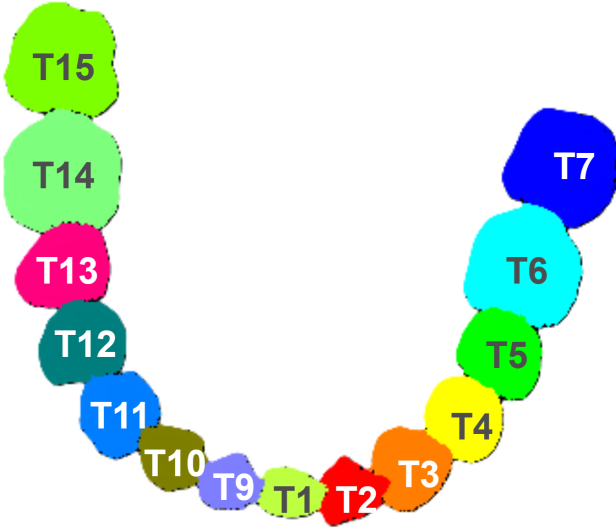

Figure 2. Classes Definition and Attention Mask in APK.

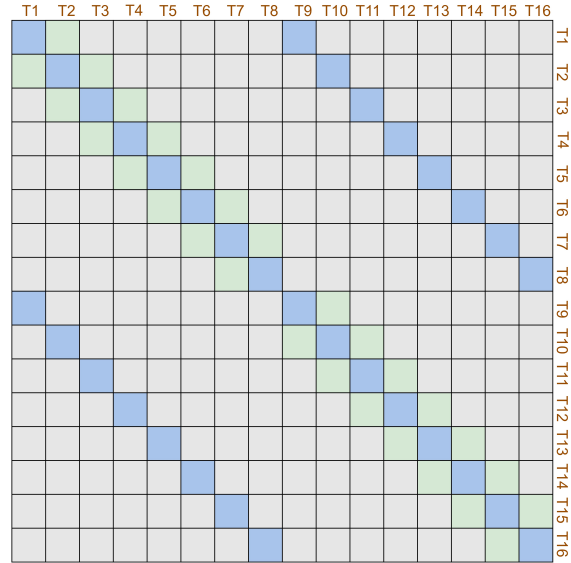

Figure 3. The attention mask of the APK layer.

## B. The Classes Definition and The Attention Mask for The APK Layer

The pre-defined order of Tooth IDs is presented in Figure 2. In Figure 3, we visualize the attention mask that only enables interaction between adjacent (green) and contralateral (blue) teeth. We set the attention score of "*inf*" for the locations with a gray color in the mask and 0 for the locations with green or blue.

## C. Supplementary Results of The O.O.D. Test and The RGB Test.

We provide the detailed quantitative results of each tooth (Table 2, Table 3) and visualizations (Table 4, Table 5) for the o.o.d. test and RGB test. We find previous methods can still provide clear and appropriate segmentation boundaries but fail to provide accurate tooth IDs in complex situations of orthodontic treatment, especially in the RGB test.

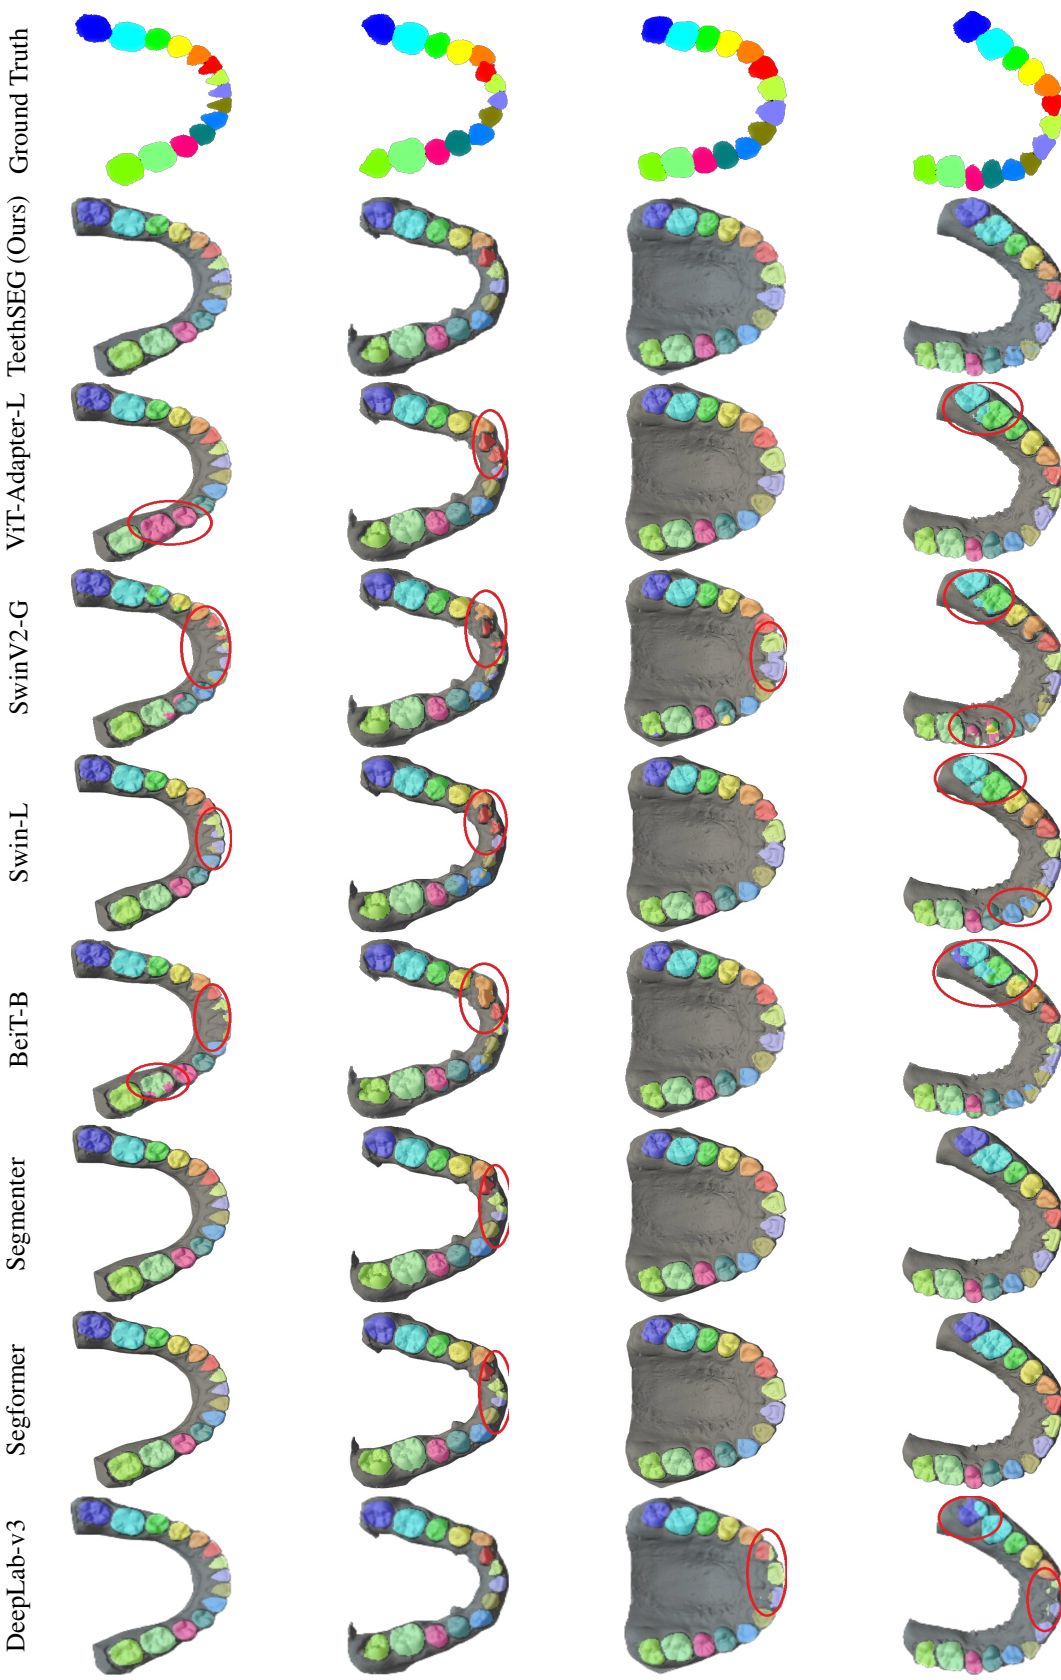

Table 4. The visual comparison of segmentation results (o.o.d test), as well as the corresponding ground truth.

| Method | Ground Truth | TeethSEG (Ours) | ViT-Adapter-L | SwinV2-G | Swin-L | BeiT-B | Segmenter | Segformer | DeepLab-v3 |
|--------|--------------|-----------------|---------------|----------|--------|--------|-----------|-----------|------------|
|        |              |                 |               |          |        |        |           |           |            |
|        |              |                 |               |          |        |        |           |           |            |
|        |              |                 |               |          |        |        |           |           |            |
|        |              |                 |               |          |        |        |           |           |            |

Table 5. The visual comparison on RGB test. Previous methods fail to provide accurate tooth IDs in complex situations of orthodontic treatment.

| Variant | Res.             | Attention Layers<br>$M$ | Embed Dim.<br>$D$ | MSA Blocks<br>$N_{\text{MSA}}$ | Naive Upscalers<br>$N_{\text{UP}}$ | mIoU        |
|---------|------------------|-------------------------|-------------------|--------------------------------|------------------------------------|-------------|
| (a)     | $224 \times 224$ | 3                       | 768               | 3                              | 2                                  | 0.83        |
| (b)     | $336 \times 336$ | 1                       | 768               | 3                              | 2                                  | 0.82        |
| (c)     | $336 \times 336$ | 2                       | 768               | 3                              | 2                                  | 0.85        |
| (d)     | $336 \times 336$ | 3                       | 256               | 3                              | 2                                  | 0.79        |
| (e)     | $336 \times 336$ | 3                       | 512               | 3                              | 2                                  | 0.89        |
| (f)     | $336 \times 336$ | 3                       | 768               | 1                              | 4                                  | 0.81        |
| (g)     | $336 \times 336$ | 3                       | 768               | 2                              | 3                                  | 0.89        |
| (h)     | $336 \times 336$ | 3                       | 768               | 3                              | 2                                  | <b>0.91</b> |

Table 6. Ablations on Hyper-parameters.

## D. Ablations on Hyper-parameters

We design a series of variants of TeethSEG to study the best choice of hyper-parameters. In Table 6, (h) presents the performance of the best variant in this paper, (a) studies the influence of resolution of inputs, (b) and (c) explore the influence of the number of the transformer layers for the shallow fusion, (d) and (e) investigate the impact intermediate dimension of embeddings, (f) and (g) study the consequence of the different number of stacked MSA Blocks.

## References

- [1] Achraf Ben-Hamadou, Oussama Smaoui, Ahmed Rekik, Sergi Pujades, Edmond Boyer, Hoyeon Lim, Minchang Kim, Minkyung Lee, Minyoung Chung, Yeong-Gil Shin, et al. 3dteethseg'22: 3d teeth scan segmentation and labeling challenge. *arXiv preprint arXiv:2305.18277*, 2023. 2
